# Supplementary material
Source: ML conference proceedings conference paper supplement (https://openreview.net/forum?id=yqkv2viaZRP)

Well-segmented cases

Challenging cases

Row 1

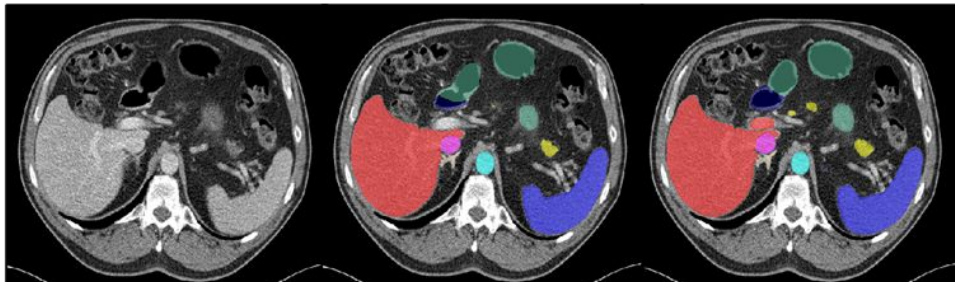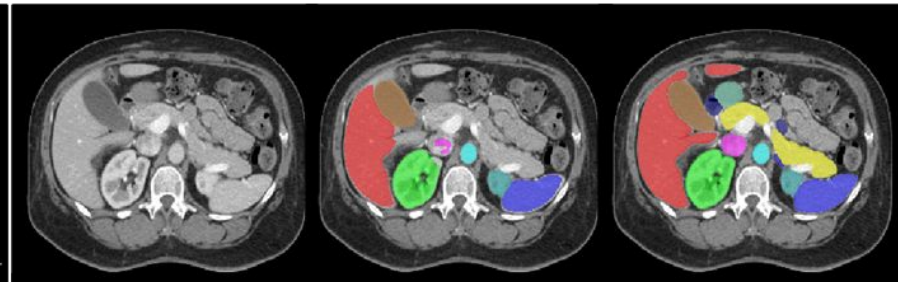

Row 2

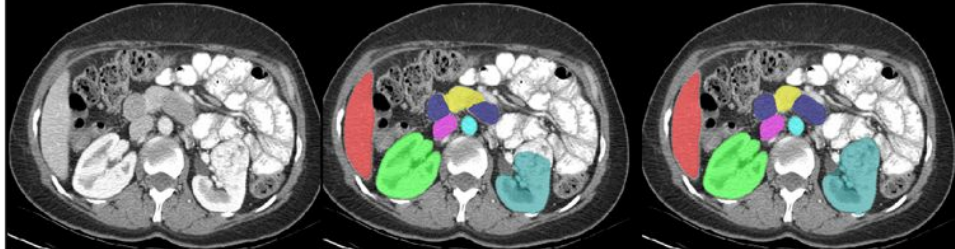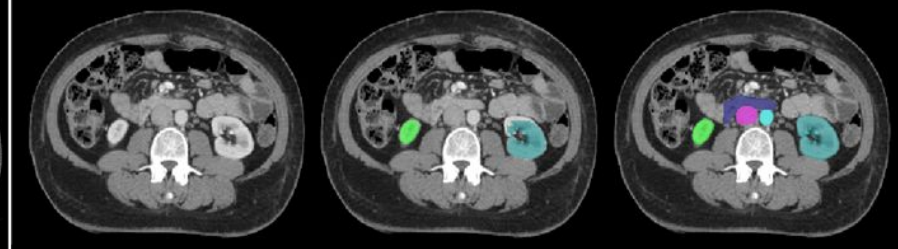

Row 3

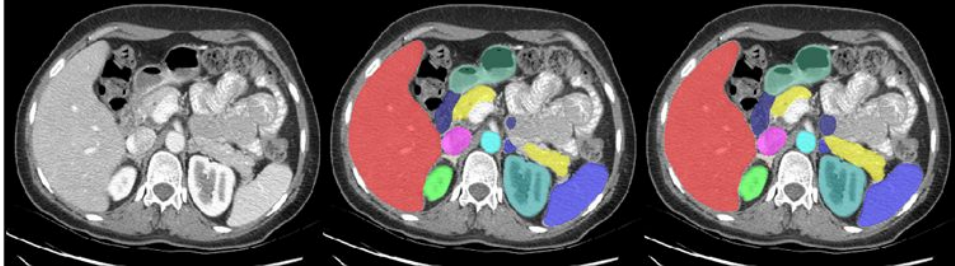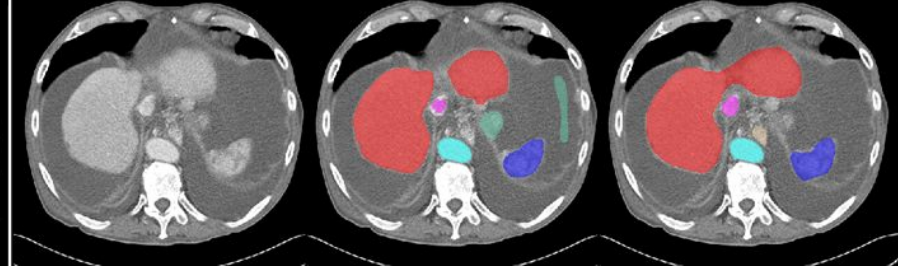

a) Input

b) Prediction

c) Ground truth

d) Input

e) Prediction

f) Ground truth

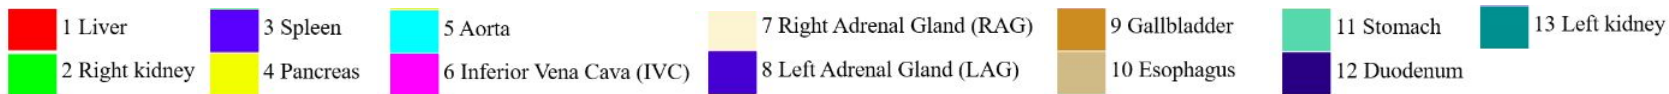

Supplement: supplementary_material [file attachment]
