# Supplementary material
Source: ML conference proceedings conference paper supplement (https://openreview.net/forum?id=yqkv2viaZRP)

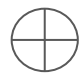

Concatenation

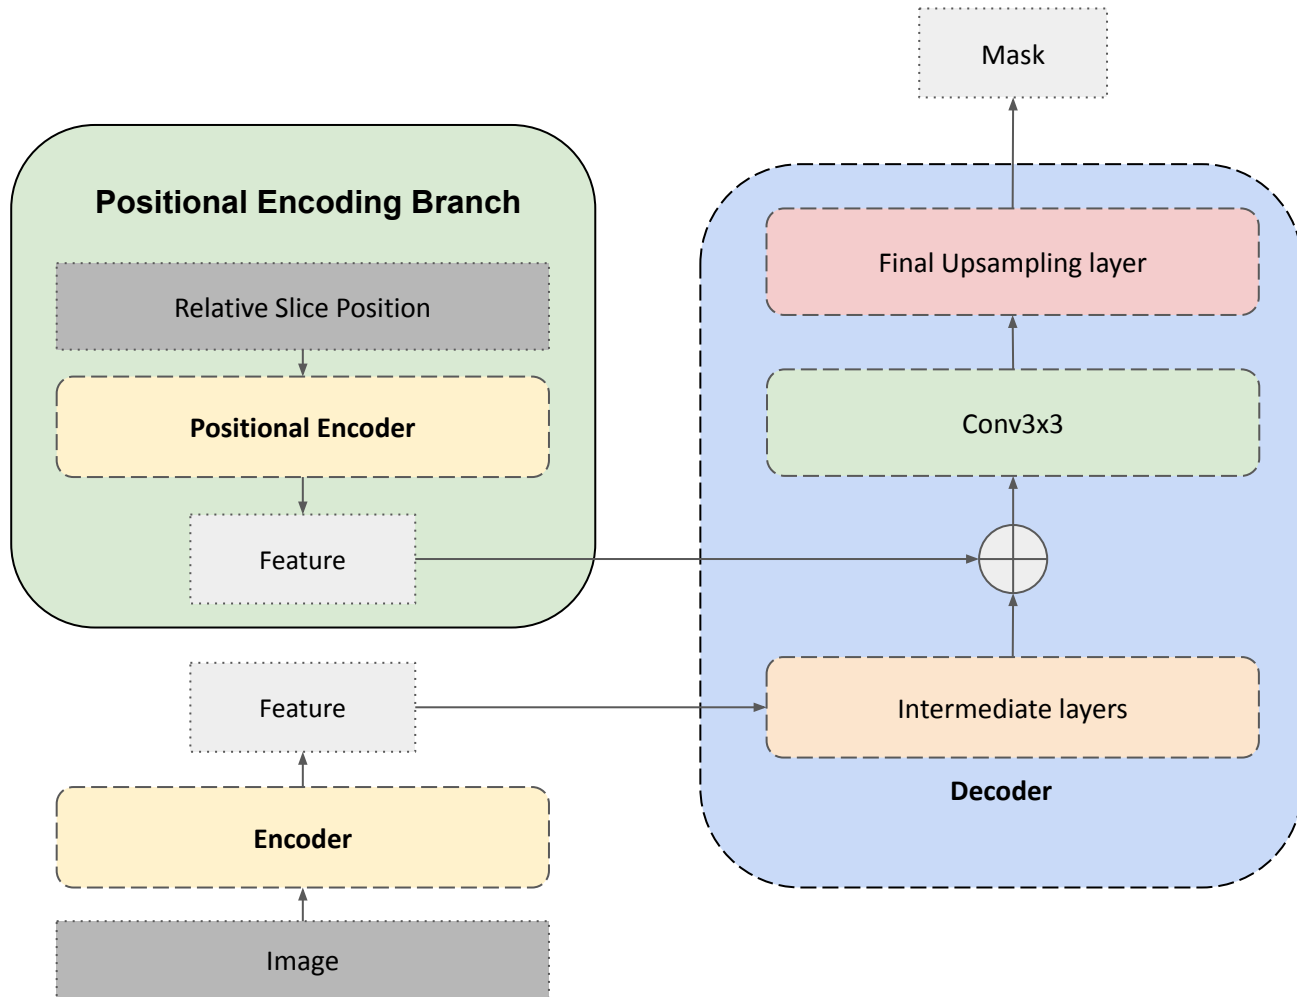

Supplement: supplementary_material [file attachment]

**Timesteps: T**

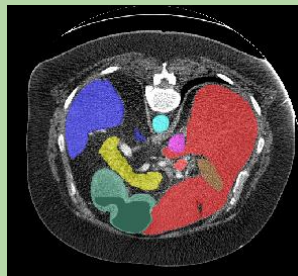

**Propagation module**

**T - 2**

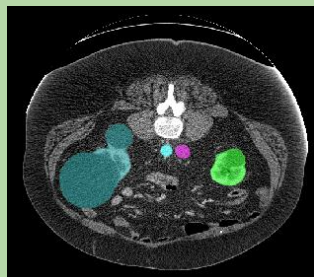

**T - 1**

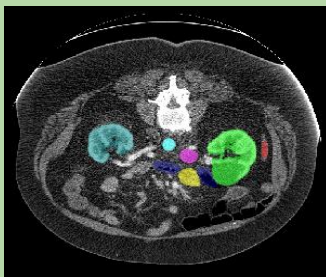

**T + 1**

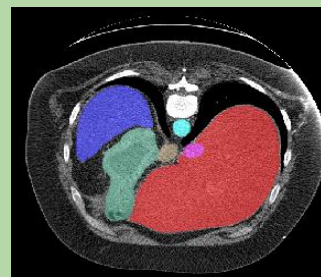

**T + 2**

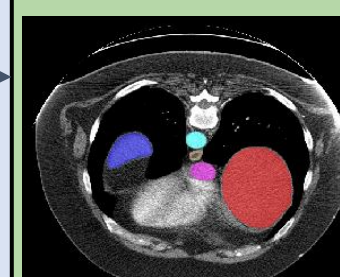

Supplement: supplementary_material [file attachment]

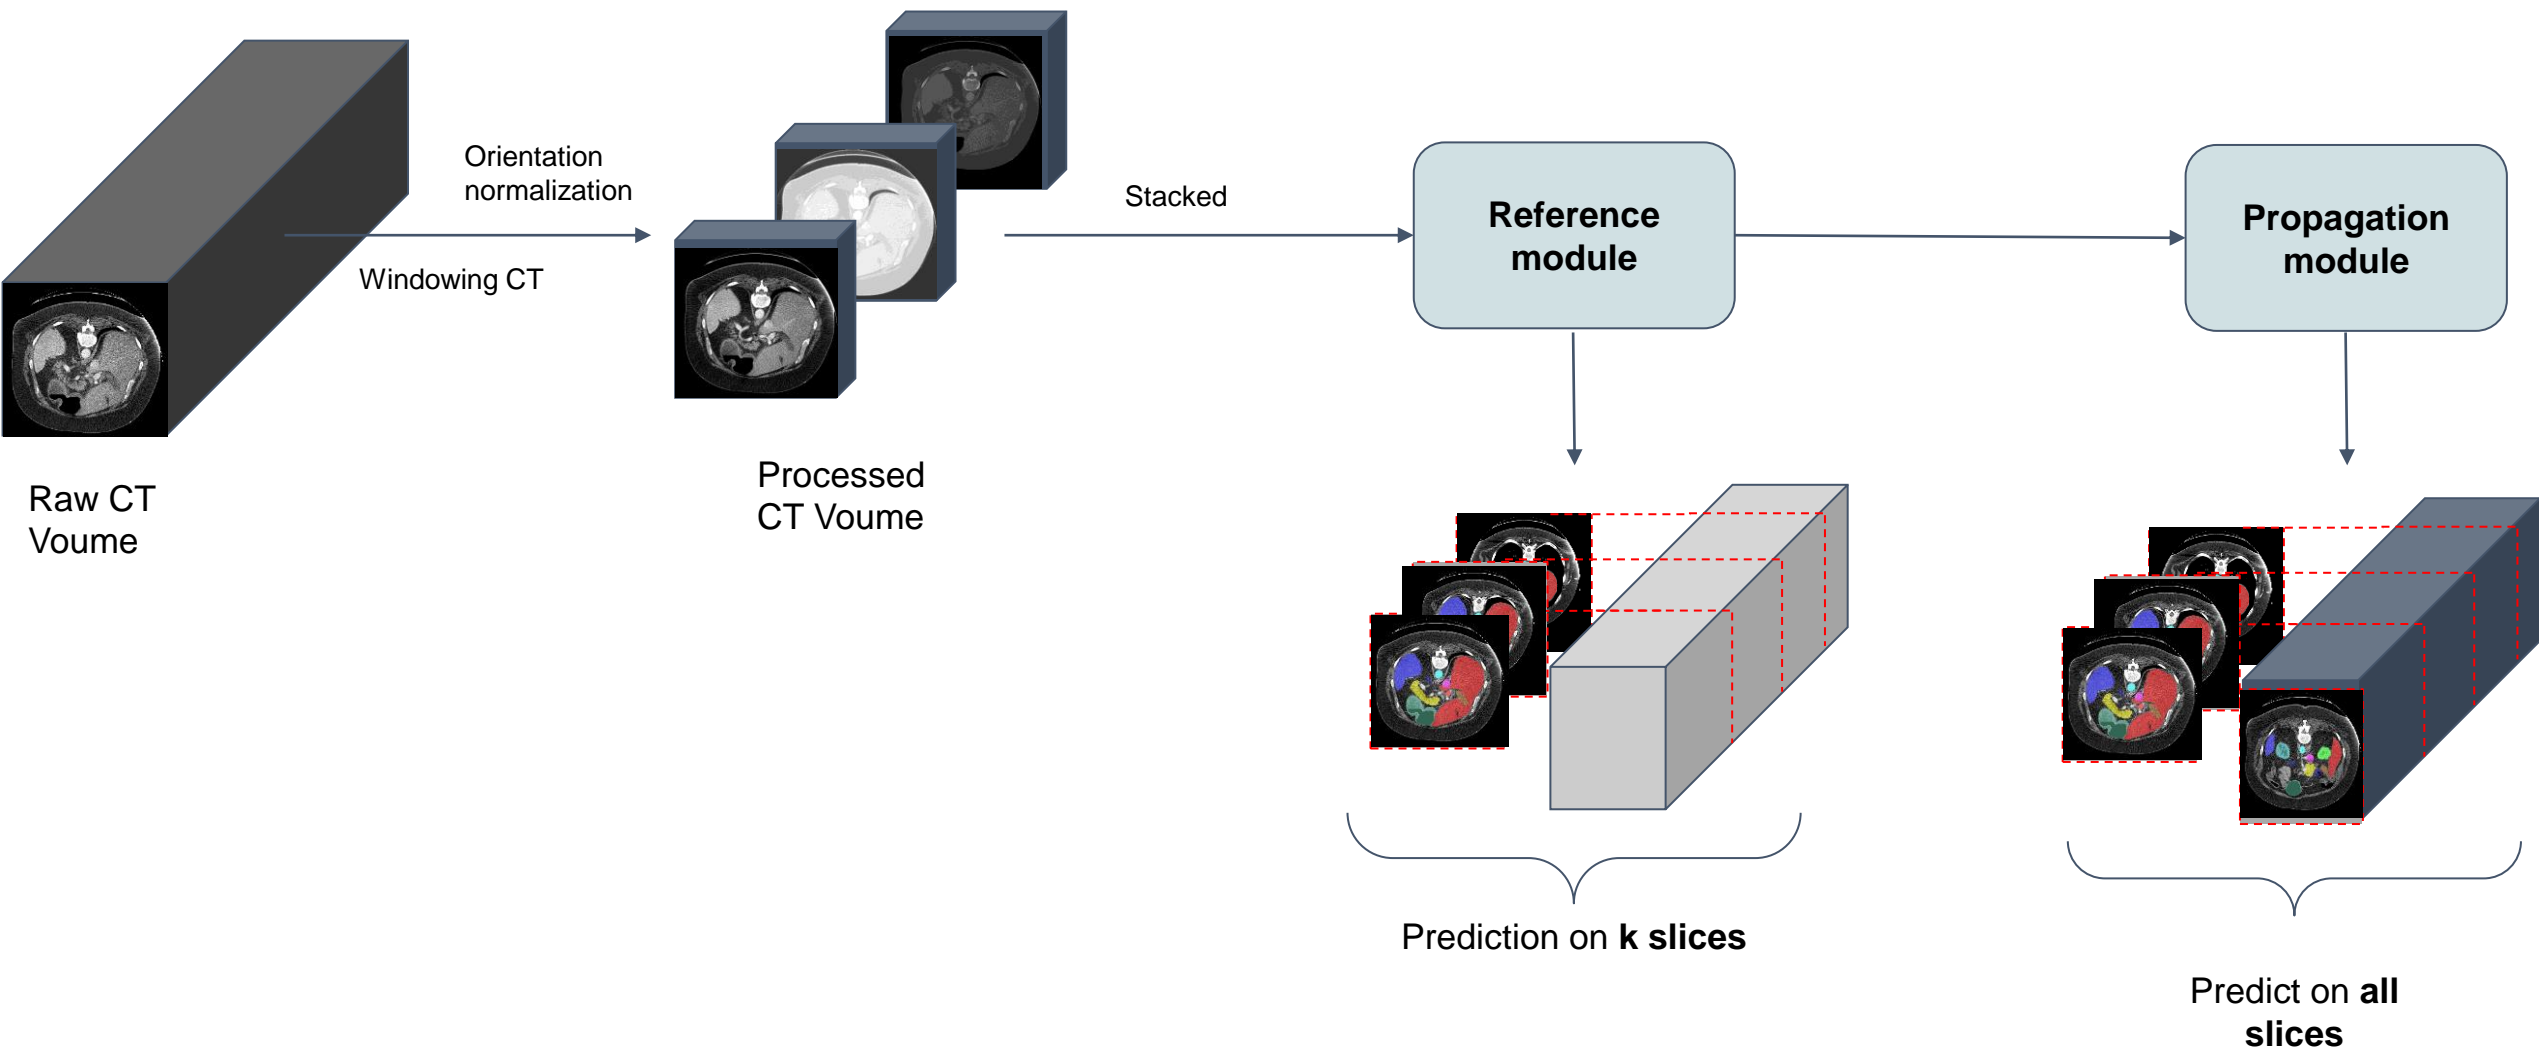

Supplement: supplementary_material [file attachment]

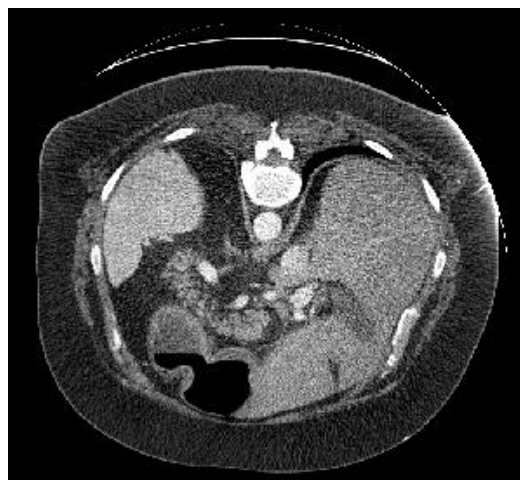

Raw slice

Orientation  
normalization

Windowing CT

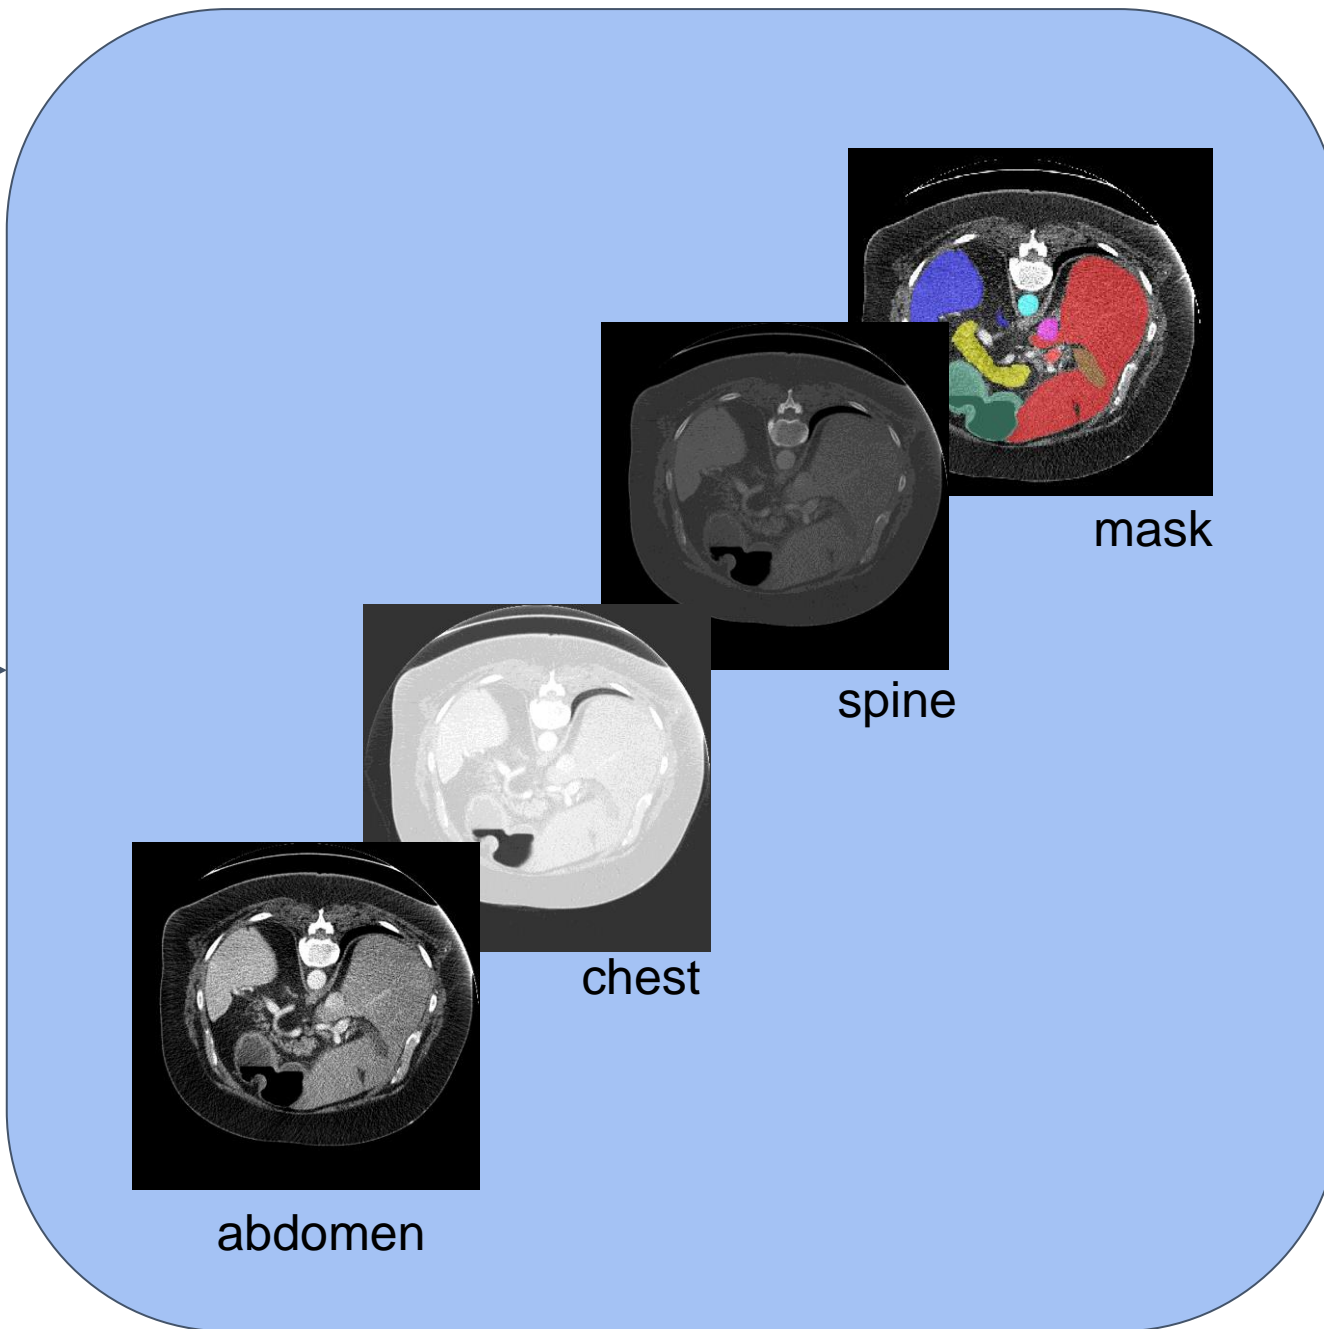

mask

spine

chest

abdomen

Supplement: supplementary_material [file attachment]

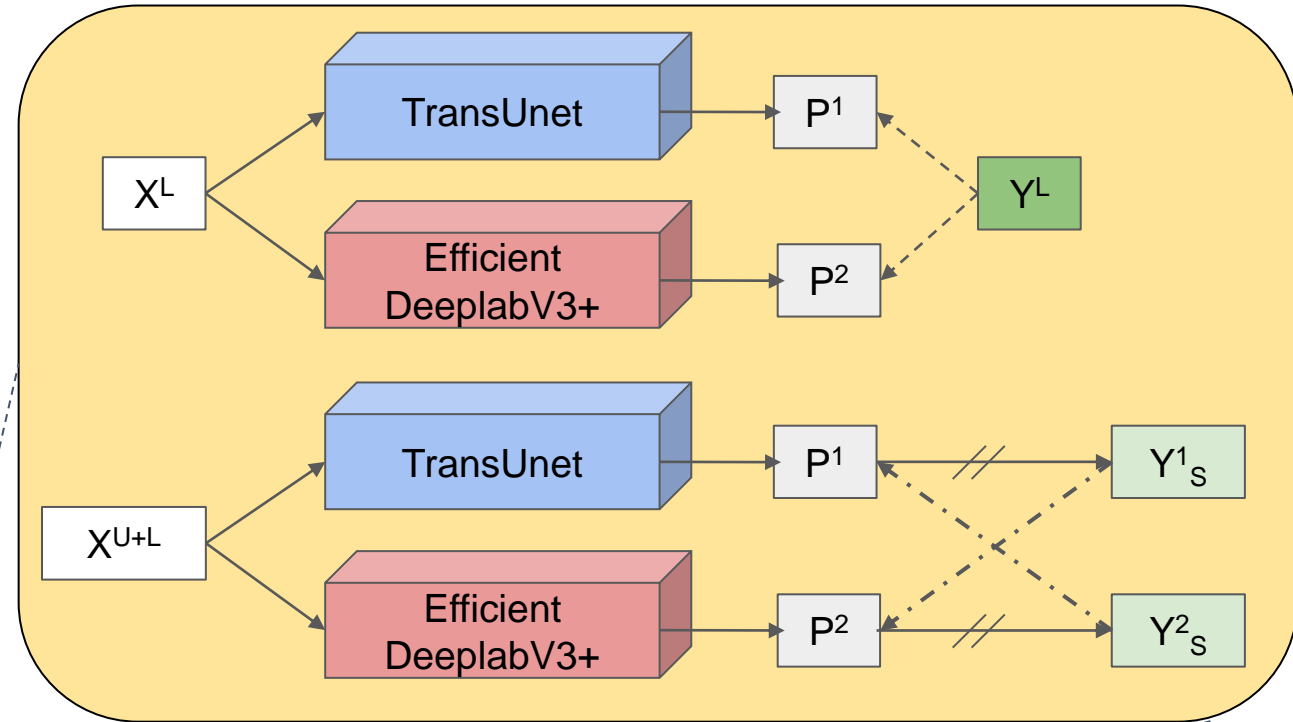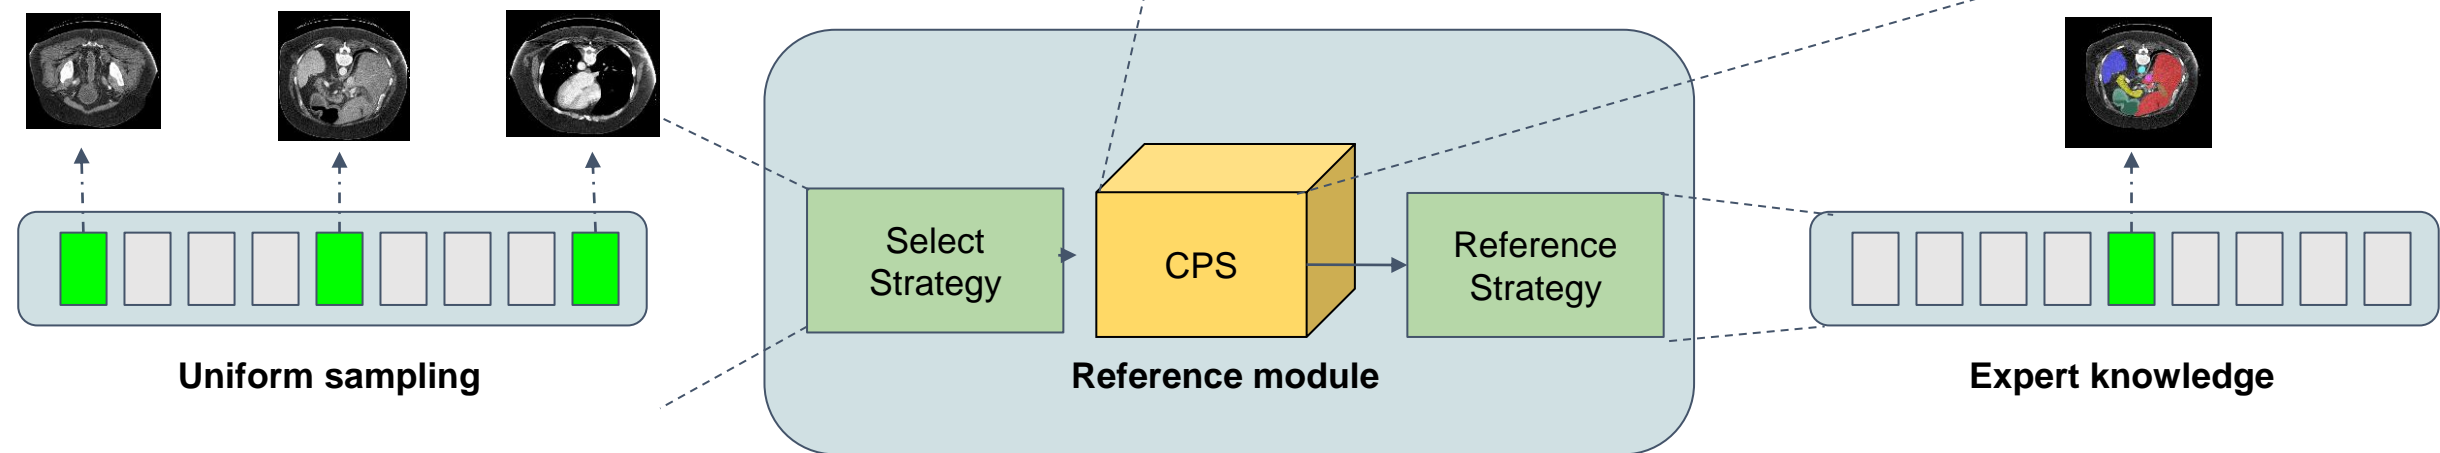

Supplement: supplementary_material [file attachment]
